# Supplementary material for: Flexible selection of the functional-group ratio on a polytetrafluoroethylene (PTFE) surface using a single-gas plasma treatment
Source: Royal Society of Chemistry journal article supplement (doi:10.1039/d2ra04763b), 2022-01-01
Supplement: d2ra04763b1.pdf [file d2ra04763b1.pdf]

## Electronic Supporting Information (ESI)

Flexible selection of the functional-group ratio on a polytetrafluoroethylene (PTFE) surface using a single-gas plasma treatment

Yuji Ohkubo, <sup>\*a</sup> Yuki Okazaki, <sup>a</sup> Misa Nishino, <sup>a</sup> Yosuke Seto, <sup>a</sup> Katsuyoshi Endo, <sup>a</sup> and Kazuya Yamamura<sup>a</sup>

<sup>a</sup> Graduate School of Engineering, Osaka University, 2-1 Yamadaoka, Suita, Osaka 565-0871, Japan

### Contents

- Representative result of peak resolution of C1s-XPS spectrum ..... **ESI-1**
- Representative group ratios of PTFE surface ..... **ESI-2**
- Representative load-depth curve of PTFE surface using a nanoindenter ..... **ESI-3**

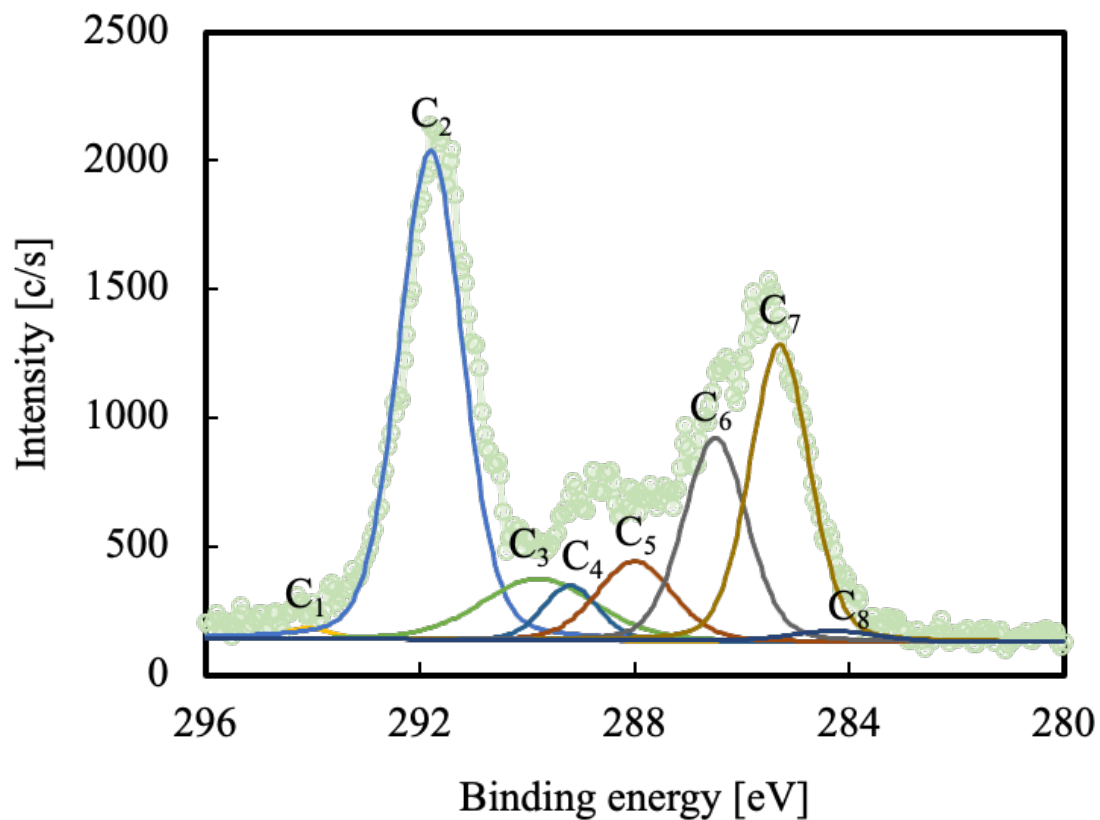

**ESI-1** Representative result of peak resolution of C1s-XPS spectrum (in the case of HAP treatment at BP = 9 Pa). Group ratios of fluorine, oxygen, and carbon on the PTFE surface, as shown in Table 1, were calculated using the XPS analysis software (XPSPEAK41).

**ESI-2** Representative group ratios of PTFE surface (in the case of HAP treatment at BP = 9 Pa). The group ratios were calculated by the sum of peak area ratios in Fig. S1.

| Sample name    | Functional group                 | Peak area ratio | Total      |
|----------------|----------------------------------|-----------------|------------|
| Fluorine group | C <sub>1</sub> : CF <sub>3</sub> | 3%              | <b>47%</b> |
|                | C <sub>2</sub> : CF <sub>2</sub> | 32%             |            |
|                | C <sub>3</sub> : C–F             | 12%             |            |
| Oxygen group   | C <sub>4</sub> : O–C=O           | 5%              | <b>26%</b> |
|                | C <sub>5</sub> : C=O             | 7%              |            |
|                | C <sub>6</sub> : C–O             | 14%             |            |
| Carbon group   | C <sub>7</sub> : C–C             | 25%             | <b>27%</b> |
|                | C <sub>8</sub> : C=C             | 2%              |            |

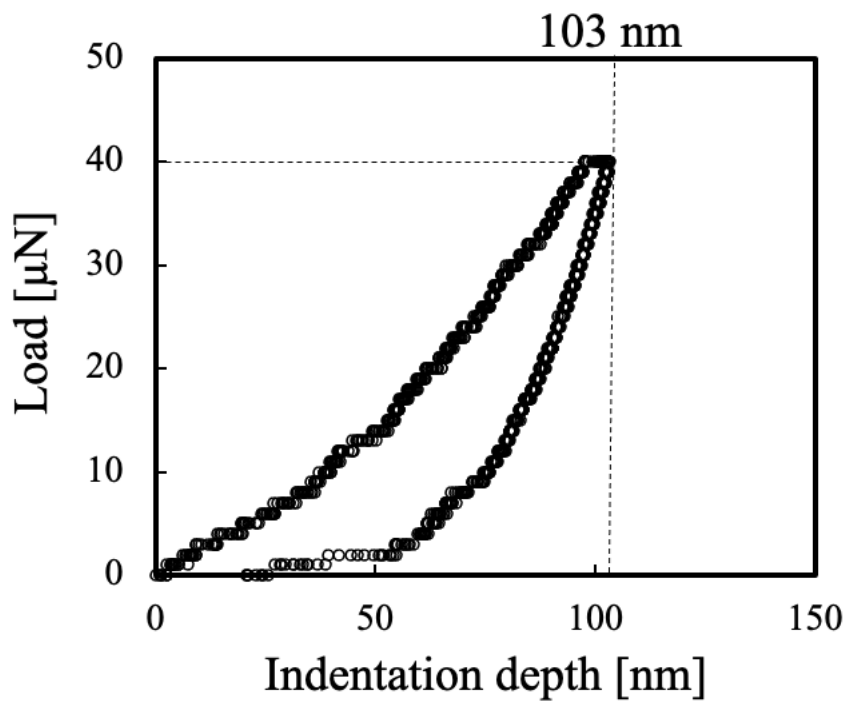

**ESI-3** Representative load-depth curve of PTFE surface using a nanoindenter (in the case of As-received).
